# Supplementary material for: Temporal and spatial transcriptional profiles of aging in Drosophila melanogaster
Source: HighWire-hosted journal article supplement (doi:10.1101/gr.6216607), 2007-07-10
Supplement: Zhan_Supplemental_Fig1.pdf [file Zhan_Supplemental_Fig1.pdf]

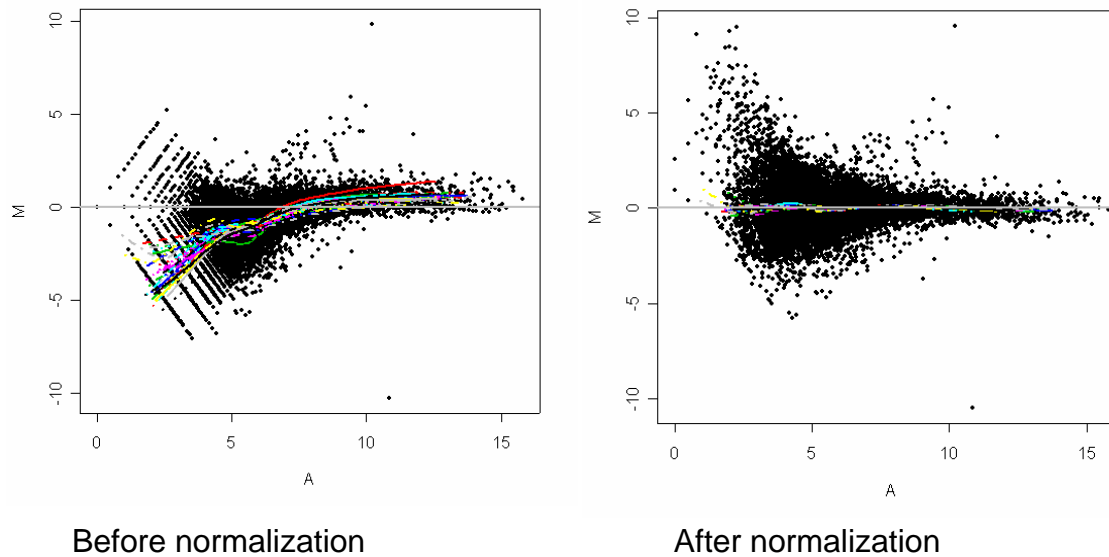

Supplemental Figure 1. Normalization of microarray data (MA Plot). Raw microarray data were processed by conducting within-slide and inter-slide normalization of signal intensities using the LOWESS curve-fitting method in Bioconductor. After normalization, the data were evenly distributed.
