# Supplementary material for: Temporal and spatial transcriptional profiles of aging in Drosophila melanogaster
Source: HighWire-hosted journal article supplement (doi:10.1101/gr.6216607), 2007-07-10
Supplement: Zhan_Supplemental_Fig2.pdf [file Zhan_Supplemental_Fig2.pdf]

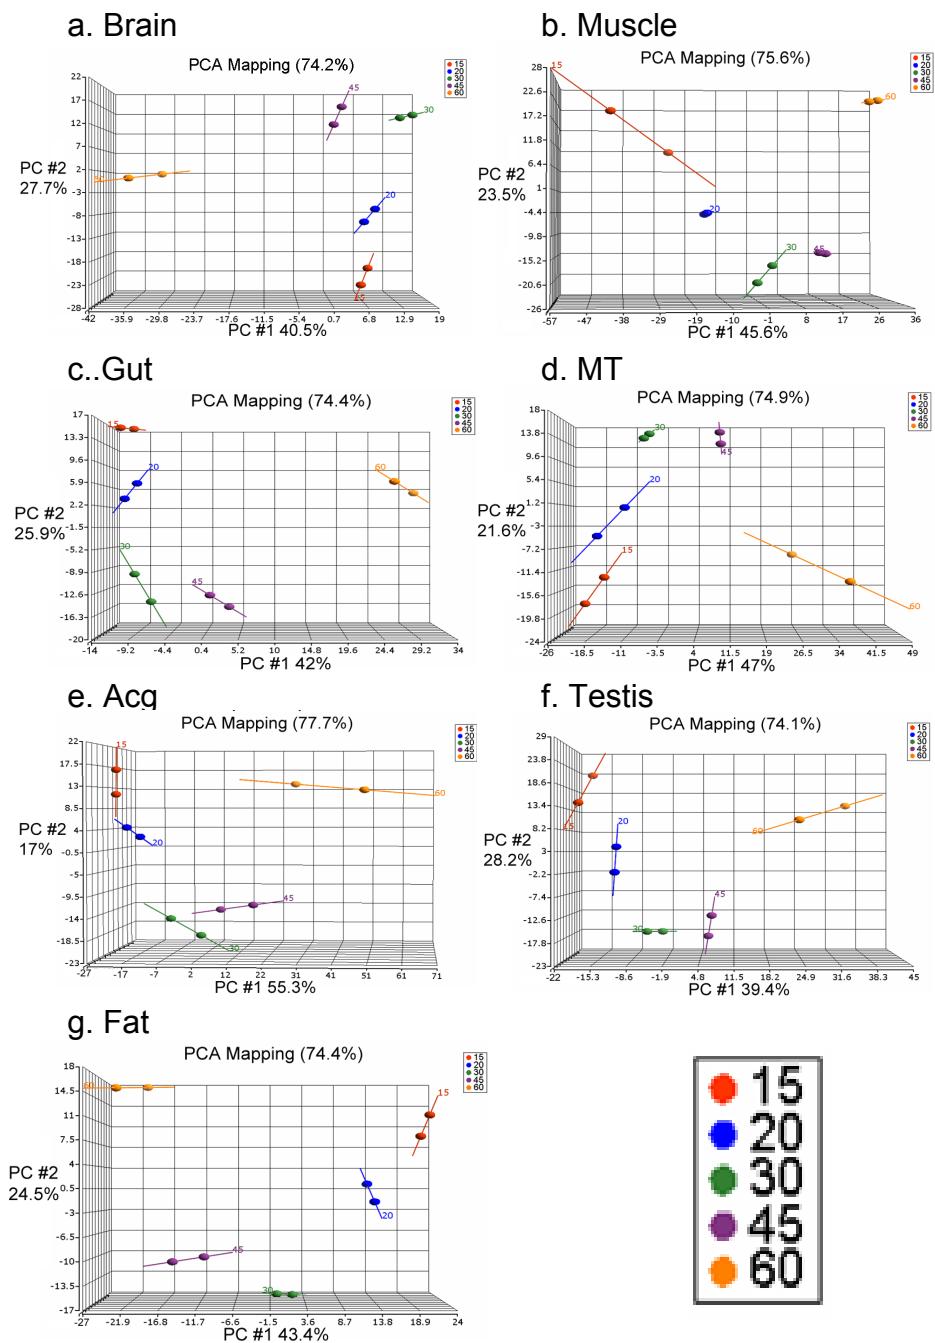

Supplemental Figure 2

Supplemental Figure 2. The PCA of temporal transcriptional profiles in individual tissues. In each PCA map, a sphere represents projection of an age sample in the 3D space formed by the top three principle components. Two data points at each age point are connected by a straight line. Percentages of variations captured by the top two principles are labeled on the corresponding axes.
