# Supplementary material for: Temporal and spatial transcriptional profiles of aging in Drosophila melanogaster
Source: HighWire-hosted journal article supplement (doi:10.1101/gr.6216607), 2007-07-10
Supplement: Zhan_Supplemental_Fig3.pdf [file Zhan_Supplemental_Fig3.pdf]

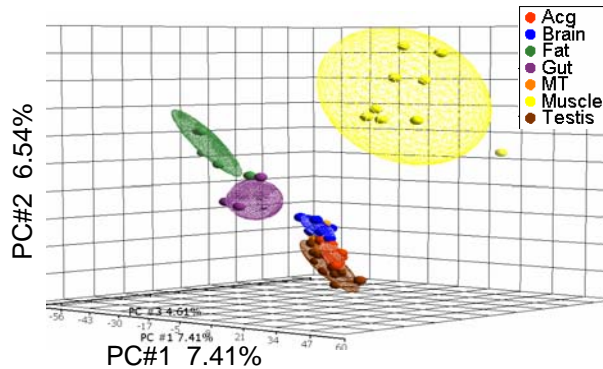

**Supplemental Figure 3.** PCA maps were generated with all the expressed genes showing relationships of transcriptional profiles of aging among different tissues. The amount of variation covered by the top three principle components are: #1 (7.41%); #2 (6.54%); #3 (4.61%). The samples of seven tissues are color-coded. Each small sphere represents projection of one age sample from one tissue in the 3D space formed by the top three principle components. Each large oval represents the area covered by all the samples of one tissue formed by the small spheres.
