# Supplementary material for: Temporal and spatial transcriptional profiles of aging in Drosophila melanogaster
Source: HighWire-hosted journal article supplement (doi:10.1101/gr.6216607), 2007-07-10
Supplement: Zhan_Supplemental_Table_16_Genes.pdf [file Zhan_Supplemental_Table_16_Genes.pdf]

Supplemental Table 16. Age-related genes in common among four or more tissues

| CG_ID   | No. of Tissues | Tissue ID (up- or down-regulated with age): |              |                        |            |          |
|---------|----------------|---------------------------------------------|--------------|------------------------|------------|----------|
| CG5453  | 5              | Acg (up) <sup>a</sup>                       | Brain (up)   | MT (down) <sup>b</sup> | MU (up)    | Tet (up) |
| CG14005 | 4              | Acg (up)                                    | Gut (down)   | MT (up)                | Tet (down) |          |
| CG7220  | 4              | Brain (up)                                  | Fat (down)   | Gut (up)               | MT (up)    |          |
| CG14216 | 4              | Brain (down)                                | Fat (down)   | Gut (up)               | MT (down)  |          |
| CG14179 | 4              | Fat (up)                                    | Gut (up)     | MT (up)                | MU (up)    |          |
| CG18445 | 4              | Acg (up)                                    | Gut (up)     | MT (up)                | MU (down)  |          |
| CG6413  | 4              | Fat (down)                                  | MT (up)      | MU (up)                | Tet (up)   |          |
| CG15797 | 4              | Acg (up)                                    | Gut (up)     | MU (down)              | Tet (down) |          |
| CG8056  | 4              | Acg (up)                                    | MT (up)      | MU (down)              | Tet (up)   |          |
| CG18316 | 4              | Acg (up)                                    | Brain (down) | MT (down)              | Tet (down) |          |
| CG14150 | 4              | Acg (up)                                    | Brain (up)   | MU (up)                | Tet (up)   |          |
| CG3101  | 4              | Acg (up)                                    | Brain (up)   | MT (down)              | MU (down)  |          |
| CG7338  | 4              | Brain (down)                                | Gut (up)     | MU (up)                | Tet (up)   |          |
| CG15009 | 4              | Acg (up)                                    | Fat (down)   | Gut (down)             | Tet (up)   |          |
| CG4237  | 4              | Acg (down)                                  | Brain (down) | Gut (down)             | MT (down)  |          |
| CG8895  | 4              | Acg (up)                                    | Fat (down)   | Gut (down)             | Tet (up)   |          |

<sup>a</sup>(up) represents that the age-related gene was upregulated with age in the corresponding tissue.

<sup>b</sup>(down) represents that the age-related gene was downregulated with age.
