# Supplementary material for: Temporal and spatial transcriptional profiles of aging in Drosophila melanogaster
Source: HighWire-hosted journal article supplement (doi:10.1101/gr.6216607), 2007-07-10
Supplement: Zhan_Supplemental_Table_18_Accession_Number.pdf [file Zhan_Supplemental_Table_18_Accession_Number.pdf]

**Supplemental Table 18.** List of accession numbers of the original data in Genbank GEO

| Access to data in GenBank GEO |                                                      |
|-------------------------------|------------------------------------------------------|
| Username:yamazah              |                                                      |
| Password: niabaltimoremd      |                                                      |
| Order                         | Access number                                        |
| 1                             | "w1118 testis 15 days set 1" as GSM132613            |
| 2                             | "w1118 testis 15 days set 2" as GSM132614            |
| 3                             | "w1118 testis 20 days set 1" as GSM132615            |
| 4                             | "w1118 testis 20 days set 2" as GSM132616            |
| 5                             | "w1118 testis 30 days set 1" as GSM132617            |
| 6                             | "w1118 testis 30 days set 2" as GSM132618            |
| 7                             | "w1118 testis 45 days set 1" as GSM132619            |
| 8                             | "w1118 testis 45 days set 2" as GSM132620            |
| 9                             | "w1118 testis 60 days set 1" as GSM132621            |
| 10                            | "w1118 testis 60 days set 2" as GSM132622            |
| 11                            | "w1118 muscle 15 days set 1" as GSM132603            |
| 12                            | "w1118 muscle 15 days set 2" as GSM132604            |
| 13                            | "w1118 muscle 20 days set 1" as GSM132605            |
| 14                            | "w1118 muscle 20 days set 2" as GSM132606            |
| 15                            | "w1118 muscle 30 days set 1" as GSM132607            |
| 16                            | "w1118 muscle 30 days set 2" as GSM132608            |
| 17                            | "w1118 muscle 45 days set 1" as GSM132609            |
| 18                            | "w1118 muscle 45 days set 2" as GSM132610            |
| 19                            | "w1118 muscle 60 days set 1" as GSM132611            |
| 20                            | "w1118 muscle 60 days set 2" as GSM132612            |
| 21                            | "w1118 fat 15 days set 1" as GSM132593               |
| 22                            | "w1118 fat 15 days set 2" as GSM132594               |
| 23                            | "w1118 fat 20 days set 1" as GSM132595               |
| 24                            | "w1118 fat 20 days set 2" as GSM132596               |
| 25                            | "w1118 fat 30 days set 1" as GSM132597               |
| 26                            | "w1118 fat 30 days set 2" as GSM132598               |
| 27                            | "w1118 fat 45 days set 1" as GSM132599               |
| 28                            | "w1118 fat 45 days set 2" as GSM132600               |
| 29                            | "w1118 fat 60 days set 1" as GSM132601               |
| 30                            | "w1118 fat 60 days set 2" as GSM132602               |
| 31                            | "w1118 malpighian tubule 15 days set 1" as GSM132582 |
| 32                            | "w1118 malpighian tubule 15 days set 2" as GSM132583 |
| 33                            | "w1118 malpighian tubule 20 days set 1" as GSM132584 |
| 34                            | "w1118 malpighian tubule 20 days set 2" as GSM132585 |
| 35                            | "w1118 malpighian tubule 30 days set 1" as GSM132586 |
| 36                            | "w1118 malpighian tubule 30 days set 2" as GSM132587 |
| 37                            | "w1118 malpighian tubule 45 days set 1" as GSM132588 |
| 38                            | "w1118 malpighian tubule 45 days set 2" as GSM132589 |
| 39                            | "w1118 malpighian tubule 60 days set 1" as GSM132590 |
| 40                            | "w1118 malpighian tubule 60 days set 2" as GSM132591 |
| 41                            | "w1118 gut 15 days set 1" as GSM132572               |
| 42                            | "w1118 gut 15 days set 2" as GSM132573               |
| 43                            | "w1118 gut 20 days set 1" as GSM132574               |
| 44                            | "w1118 gut 20 days set 2" as GSM132575               |
| 45                            | "w1118 gut 30 days set 1" as GSM132576               |
| 46                            | "w1118 gut 30 days set 2" as GSM132577               |
| 47                            | "w1118 gut 45 days set 1" as GSM132578               |

48 "w1118 gut 45 days set 2" as GSM132579  
49 "w1118 gut 60 days set 1" as GSM132580  
50 "w1118 gut 60 days set 2" as GSM132581  
51 "w1118 brain 15 days set 1" as GSM132562  
52 "w1118 brain 15 days set 2" as GSM132563  
53 "w1118 brain 20 days set 1" as GSM132564  
54 "w1118 brain 20 days set 2" as GSM132565  
55 "w1118 brain 30 days set 1" as GSM132566  
56 "w1118 brain 30 days set 2" as GSM132567  
57 "w1118 brain 45 days set 1" as GSM132568  
58 "w1118 brain 45 days set 2" as GSM132569  
59 "w1118 brain 60 days set 1" as GSM132570  
60 "w1118 brain 60 days set 2" as GSM132571  
61 "Fly Acg 15 days set 1" as GSM132264  
62 "Fly Acg 15 days set 2" as GSM132265  
63 "Fly Acg 20 days set 1" as GSM132266  
64 "Fly Acg 20 days set 2" as GSM132267  
65 "Fly Acg 30 days set 1" as GSM132268  
66 "Fly Acg 30 days set 2" as GSM132269  
67 "Fly Acg 45 days set 1" as GSM132270  
68 "Fly Acg 45 days set 2" as GSM132271  
69 "Fly Acg 60 days set 1" as GSM132272  
70 "Fly Acg 60 days set 2" as GSM132273
